# Supplementary material
Source: publisher figshare collection journal article supplement (https://tandf.figshare.com/ndownloader/files/29077265)
Supplement: Supplementary file 1 [file 29077265]

**SUPPLEMENTARY D**

| **Cumulative incidence of distant metastasesa (competing riskb)** | | | |  |  |  |
| --- | --- | --- | --- | --- | --- | --- |
|  | **Cumulative incidence % [95 % CI]:** | | |  |  |  |
|  | **1 year** | **2 years** | **3 years** | **4 years** | **5 years** | **P-valuec** |
| **All patients** | 4.2 [3.7;4.7] | 6.2 [5.6;6.8] | 7.0 [6.3;7.6] | 7.6 [6.9;8.2] | 7.9 [7.2;8.5] |  |
| p16-positive OPSCC | 2.3 [1.6;2.9] | 4.3 [3.4;5.3] | 5.2 [4.3;6.2] | 6.1 [5.1;7.2] | 6.6 [5.4;7.7] |  |
| p16-negative OPSCC | 6.9 [5.3;8.4] | 8.6 [6.9;10.3] | 8.9 [7.1;10.6] | 9.4 [7.6;11.3] | 9.6 [7.7;11.4] | 0.002* |
| Glottic Larynx | 1.5 [0.1;2.1] | 2.4 [1.6;3.2] | 2.5 [1.7;3.4] | 2.8 [1.9;3.7] | 2.9 [2.0;3.8] |  |
| Non-glottic Larynx | 3.4 [2.0;4.7] | 5.5 [3.8;7.2] | 6.3 [4.5;8.1] | 6.9 [5.0;8.9] | 7.4 [5.5;9.3] |  |
| Nasopharynx | 7.1 [3.6;10.7] | 12.3 [7.8;16.9] | 14.8 [9.9,19.8] | 14.8 [9.9;19.8] | 14.8 [9.9;19.8] |  |
| Hypopharynx | 12.1 89.6;14.7] | 15.8 [13.0;18.6] | 17.3 [14.4;20.3] | 18.3 [15.3;21.4] | 18.5 [15.5;22.2] |  |
| aWith/without concurrent locoregional recurrence | |  |  |  |  |  |
| bCompeting risks to DM were:  "Dead - no evidence of disease", "locoregional recurrence (T and/or N) without DM" | | | |  |  |  |
| cTest for equality across groups (Gray's test) | |  |  |  |  |  |

**Supplementary D:**  Table showing 1- to 5-year cumulative incidence according to HNSCC subsite.
